# Supplementary material for: Four Cycles of Docetaxel-Cyclophosphamide versus Anthracycline-Taxane as Adjuvant Chemotherapy for HER2-Negative, Axillary Lymph Node Negative Breast Cancer: A Real-World Comparison of Alberta Patients Treated 2008–2012
Source: MDPI journal article supplement (doi:10.3390/curroncol28020109), 2021-03-04
Supplement: s1 [file s1]

Supplementary Materials

# Four Cycles of Docetaxel-Cyclophosphamide Versus Anthracycline-Taxane as Adjuvant Chemotherapy for HER2-Negative, Axillary Lymph Node Negative Breast Cancer: A Real-World Comparison of Alberta Patients Treated 2008-2012

Malek Hannouf <sup>1</sup>, Atul Batra <sup>2,3</sup> and Sasha Lupichuk <sup>2,\*</sup>

Table S1. Cox regression analyses for iDFS, BCSS, and OS.

| Proportional-hazard models*                                            |                                                                                                                             | Patients with DC4 vs. patients with AT |            |         |      |            |         |      |            |         |
|------------------------------------------------------------------------|-----------------------------------------------------------------------------------------------------------------------------|----------------------------------------|------------|---------|------|------------|---------|------|------------|---------|
|                                                                        |                                                                                                                             | iDFS                                   |            |         | BCSS |            |         | OS   |            |         |
|                                                                        |                                                                                                                             | HR                                     | 95% CI     | p-value | HR   | 95% CI     | p-value | HR   | 95% CI     | p-value |
| Matched patients with DC4 vs. patients with AT (1:4 matching; n = 271) |                                                                                                                             | 1.05                                   | 0.65 - 1.8 | 0.85    | 0.91 | 0.42 - 1.9 | 0.8     | 0.98 | 0.46 - 2.1 | 0.96    |
| All patients with DC4 vs. patients with AT (n = 726)                   | Unadjusted for patient and disease characteristics†                                                                         | 0.87                                   | 0.52 - 1.5 | 0.61    | 0.73 | 0.36 - 1.4 | 0.4     | 0.94 | 0.47 - 1.8 | 0.88    |
|                                                                        | Adjusted for patient and disease characteristics†                                                                           | 0.98                                   | 0.56 - 1.7 | 0.94    | 0.96 | 0.46 - 1.9 | 0.9     | 0.92 | 0.44 - 1.9 | 0.83    |
|                                                                        | Adjusted for the estimated propensity score                                                                                 | 0.92                                   | 0.51 - 1.6 | 0.77    | 0.92 | 0.46 - 1.9 | 0.9     | 0.96 | 0.55 - 1.7 | 0.92    |
|                                                                        | Adjusted for patient and disease characteristics using inverse probability weighting by the inverse of the propensity score | 1.06                                   | 0.57 - 1.9 | 0.84    | 0.90 | 0.57 - 1.9 | 1.0     | 0.95 | 0.6 - 1.7  | 0.94    |

\*We created time dependent covariates by creating interactions of the covariates and a function of survival time in the models to test proportionality. When time dependent covariates were not significant then covariates were considered proportional. The proportionality assumption was appropriate for all. † Patient and disease characteristics included age, sex, co-morbidity, number and type of metastatic sites, grade differentiation, histology, and year of initial diagnosis. Abbreviations: HR = Hazard ratio; iDFS = Invasive disease free survival; BCSS = Breast cancer specific-survival; OS = Overall survival; DC×4 = Four cycles of docetaxel-cyclophosphamide; AT= Anthracycline-taxane regimen.
